# Supplementary material
Source: HighWire-hosted journal article supplement (https://www.cmajopen.ca/highwire/filestream/81118/field_highwire_adjunct_files/1/2018-0020-original-submission.pdf)
Supplement: 2018-0020-original-submission.pdf [file 2018-0020-original-submission.pdf]

# Growth hormone treatment of Canadian children: results from the GeNeSIS surveillance program

Cheri Deal, PhD, MD<sup>1</sup>, Susan Kirsch, MD<sup>2</sup>, Jean-Pierre Chanoine, MD, PhD<sup>3</sup>, Sarah  
Lawrence, MD<sup>4</sup>, Elizabeth Cummings, MD<sup>5</sup>, Elizabeth T. Rosolowsky, MD, MPH<sup>6</sup>, Seth D.  
Marks, MD, MSc<sup>7</sup>, Nan Jia, PhD<sup>8</sup>, Christopher J Child, PhD<sup>9</sup>, GeNeSIS National Board on  
behalf of the GeNeSIS Canada Investigators

<sup>1</sup>University of Montreal and CHU Ste-Justine, Montreal, Canada, <sup>2</sup>Lilly Research  
Laboratories, Toronto, Ontario, Canada, <sup>3</sup>Endocrinology and Diabetes Unit, British Columbia  
Children's Hospital, Vancouver, British Columbia, Canada, <sup>4</sup>Division of Endocrinology and  
Metabolism, Children's Hospital of Eastern Ontario, Ottawa, Ontario, Canada, <sup>5</sup>Division of  
Endocrinology, IWK Health Centre, Dalhousie University, Halifax, Nova Scotia, Canada,  
<sup>6</sup>Division of Endocrinology, Department of Pediatrics, University of Alberta, Edmonton  
Clinic Health Academy, Edmonton, Alberta, Canada, <sup>7</sup>Department of Pediatrics and Child  
Health, Children's Hospital HSC Winnipeg, University of Manitoba, Winnipeg, Manitoba,  
Canada, <sup>8</sup>Lilly Research Laboratories, Indianapolis, Indiana, USA, <sup>9</sup>Eli Lilly & Company,  
Windlesham, UK

## Corresponding author:

Cheri Deal, PhD, MD, FRCPC  
Chief, Endocrine and Diabetes Service, CHU Ste-Justine  
Prof. of Pediatrics, Université de Montréal  
3175 Côte Ste-Catherine  
Montréal, QC, H3T 1C5, Canada

[Cheri.L.Deal@umontreal.ca](mailto:Cheri.L.Deal@umontreal.ca)

FAX : 514-345-4988

1  
2  
3  
4  
5  
6  
7  
8  
9  
10  
11  
12  
13  
14  
15  
16  
17  
18  
19  
20  
21  
22  
23  
24  
25  
26  
27  
28  
29  
30  
31  
32  
33  
34  
35  
36  
37  
38  
39  
40  
41  
42  
43  
44  
45  
46  
47  
48  
49  
50  
51  
52  
53  
54  
55  
56  
57  
58  
59  
60

TEL : 514-345-4931, poste 6209

**Short title/Running header:** GH therapy in Canadian children

**Keywords:** short stature, growth, safety, pediatric GH treatment, near-adult height

**Funding:** GeNeSIS is funded by Eli Lilly & Company

**Word count:** abstract, text, tables, figures

Confidential

## Abstract

**BACKGROUND:** Country-specific data on outcomes of recombinant human growth hormone (GH) treatment are lacking, so we present such data for GH-treated children in Canada.

**METHODS:** We describe characteristics and outcomes of 850 GH-treated children (mean baseline age 8.5 years) constituting the Canadian cohort of the multinational observational Genetics and Neuroendocrinology of Short-stature International Study (GeNeSIS; Clinical Trial Registry Number: NCT01088412) of pediatric patients. Diagnosis associated with short stature was as determined by the investigator. Auxological data were evaluated yearly until near-adult height (NAH). Adverse events were assessed in all GH-treated patients.

**RESULTS:** The diagnosis ascribed as the cause of short stature was GH deficiency (GHD) in 61.9% of cases, predominantly organic (OGHD) rather than idiopathic (IGHD), particularly congenital pituitary abnormalities and intracranial tumors. All diagnostic groups with sufficient patients for analysis had increased height velocity standard deviation score (SDS) and height SDS during GH treatment. For patients who reached NAH (n=293), mean height SDS was within normal range for approximately 80% of patients with OGHD (n=131) or IGHD (n=50), 50% of patients with idiopathic short stature (n=10) and 46% of patients with Turner syndrome (n=79). Eleven deaths were reported, seven in patients with OGHD. Serious adverse events considered GH-related (n=19) were isolated except for medulloblastoma recurrence (n=2) and adenoidal hypertrophy (n=2).

**INTERPRETATION:** GH treatment was effective and had a good safety profile in Canadian children. Compared with the USA and total GeNeSIS cohorts, GH doses were lower and a greater proportion of treated Canadian children had OGHD.

1  
2  
3 **Introduction**  
4  
5

6 Children with short stature and/or low growth velocity may benefit from growth hormone  
7 (GH) treatment to increase adult height [1]. Recombinant human GH was initially approved  
8 for GH deficiency (GHD), which remains the main indication. GHD can be due to congenital  
9 for GH deficiency (GHD), which remains the main indication. GHD can be due to congenital  
10 or acquired causes [2,3]. Pediatric GH therapy has been approved in many countries for  
11 additional conditions, including Turner syndrome, small for gestational age (SGA), Prader-  
12 Willi syndrome, chronic renal insufficiency, short stature homeobox (*SHOX*)-containing gene  
13 deficiency, Noonan syndrome and idiopathic short stature (ISS) [1,4–11].  
14  
15  
16  
17  
18  
19  
20

21 For approved indications and doses, GH therapy is generally believed to be safe [12-14].  
22 Large international databases of GH-treated patients, including the Genetics and  
23 Neuroendocrinology of Short Stature International Study (GeNeSIS), have been used to  
24 examine long-term outcomes and safety in ‘real-world’ settings [15-21]. Canada has a long  
25 history in helping establish GH safety and effectiveness, through clinical trials and  
26 surveillance programs [4,22-24] beginning in the 1960s and continuing until 2015 with the  
27 GeNeSIS program.  
28  
29  
30  
31  
32  
33  
34  
35

36 While multinational surveillance studies, such as GeNeSIS, provide global information,  
37 GH treatment uptake and outcomes may differ across and between countries. Such differences  
38 may involve approved indications and doses, age chosen for treatment initiation, funding  
39 sources for treatment, and patient characteristics that can influence the outcomes. Country-  
40 specific data on outcomes of GH therapy have currently been reported to only a limited extent  
41 [19,25-28]. The objective of the current report was to evaluate outcomes of GH treatment in  
42 pediatric patients in Canada, comparing findings with those from the US and the overall  
43 global population, using data collected in GeNeSIS.  
44  
45  
46  
47  
48  
49  
50  
51  
52  
53  
54  
55  
56  
57  
58  
59  
60

## Methods

### Patient population

The prospective, multinational, open-label, post-marketing surveillance program GeNeSIS was designed to examine safety and effectiveness of GH (somatropin; Humatrope<sup>®</sup>, Eli Lilly and Company, Indianapolis, USA) administered in children. Data were collected according to the ethical principles of the Declaration of Helsinki, and the protocol was approved by appropriate local ethics review committees. Written informed consent for data collection, processing and publication was provided by a parent/legal guardian according to national laws and regulations; the child also provided assent when appropriate.

The observational nature of GeNeSIS meant that all diagnoses and measurements were as reported by the attending physician. GHD and ISS were defined using current guidelines [14,29]. Diagnoses and treatments were to be performed according to standard pediatric endocrinology practice, and all treatment decisions were at the discretion of the participating investigator. Patients enrolled in GeNeSIS and who received GH treatment could be either GH-naïve at entry or already treated with GH. Patients presenting with closed epiphyses were excluded, although patients who had epiphyseal closure during participation could continue in the study. Patients were enrolled at 14 centers in Canada. The present report examined data from the start of the study in April 1999 until study closure in September 2015.

### Study evaluations

The 2000 US National Center for Health Statistics standards [30] were used to calculate height standard deviation score (SDS) for all countries in GeNeSIS, except Japan. Pre-specified age- and gender-matched reference data [31] were used for height velocity SDS. Target height was based on the sex-adjusted average of parental heights where available;

1  
2  
3  
4  
5  
6  
7  
8  
9  
10  
11  
12  
13  
14  
15  
16  
17  
18  
19  
20  
21  
22  
23  
24  
25  
26  
27  
28  
29  
30  
31  
32  
33  
34  
35  
36  
37  
38  
39  
40  
41  
42  
43  
44  
45  
46  
47  
48  
49  
50  
51  
52  
53  
54  
55  
56  
57  
58  
59  
60

pubertal stage was recorded according to the Tanner classification [32,33]. Near-adult height (NAH) was defined as the patient having reached one of the following criteria: closed epiphyses, height velocity <2 cm/year or bone age >14 years for girls or >16 years for boys.

Adverse events were evaluated, with the investigator assessing the relationship of each event to GH treatment (possibly/probably or not related). Serious adverse events (SAEs) were classified according to Canadian guidelines [34]. Treatment-emergent adverse events (TEAEs) were defined as events that first occurred or worsened in severity after the start of GH treatment and, thus, were evaluated only in GH-treated patients with at least one post-baseline visit. Adverse events were categorized according to the Medical Dictionary for Regulatory Activities (MedDRA), version 18.1.

**Data analysis and statistics**

The observational nature of the study meant that various data were missing for some patients. Each analysis used the maximum available data, and patient numbers therefore varied between specific analyses. Changes in auxological parameters during treatment were evaluated for the following patient subgroups: (1) GH-naïve at entry with both baseline and 1-year height SDS data (n=274); (2) GH-naïve at entry with yearly height measurements for at least 4 years (n=165); and (3) reached NAH during the study and were either GH-naïve or already GH treated at entry to GeNeSIS (n=293). Data are presented as means with 95% confidence interval (CI) for continuous variables, and as frequency and percentage for categorical variables. Outcomes across different diagnostic groups could be compared by examination of the overlap of 95% CI. Statistical analyses were conducted using SAS® 9.1.

## Results

### Patient characteristics

In total, 848 GH-treated Canadian children (53.7% male, 46.3% female) had data evaluable for effectiveness analyses; two further patients were only included in safety analyses. At GeNeSIS entry, 528 (62.3%) were receiving GH and 320 (37.7%) were GH-naïve. Ethnic origin was Caucasian for 90.1% of patients with relevant information; however, ethnicity data were not provided for 59.8% of patients. The most frequent primary diagnosis was GHD (61.9%; Table 1), with the majority reported to be due to organic causes (379/526 [72.1%]).

Among the 379 patients with organic GHD (OGHD), 184 had congenital pituitary development abnormalities and 102 had an intracranial tumor. After GHD, the next largest diagnostic category identified was Turner syndrome (18.4%). The diagnoses for the US GeNeSIS patients are shown for comparison. The proportions of children with idiopathic GHD (IGHD) or ISS were higher in the USA than in Canada, whereas the proportion with Turner syndrome appeared lower in the USA. The proportions of males with GHD (OGHD or IGHD) were similar in Canada and the global population, whereas GH-treated patients with ISS or born SGA appeared more likely to be male in Canada than globally (data not shown).

Overall mean age at start of GH treatment was 8.5 years (range 0.01–18.2 years). For diagnostic groups most frequently reported (Supplemental Table 1), mean age at GH start was highest for patients with ISS. Patients with OGHD had a lower mean age at GH start than patients with IGHD. Age at GH start was  $\geq 10$  years for 47.5% and 64.6% of patients with OGHD and IGHD, respectively, and for 57.1% of patients with Turner syndrome and 78.9% of patients with ISS. At baseline, the majority of both female (85.8%) and male (79.9%) patients were prepubertal, with similar percentages across diagnostic groups, except for ISS,

in which 60.0% of females and 48.0% of males had started puberty. Gender data for the US (not shown) and the entire GeNeSIS cohort were similar.

Mean peak GH in GH stimulation tests was  $<5 \mu\text{g/l}$  for both OGHD and IGHD (Supplemental Table 1), whereas results for patients with ISS were higher, as expected (mean peak GH  $24.1 \mu\text{g/l}$ ). Stimulated peak GH levels in Canadian children with GHD were lower than those in the global cohorts.

Mean dose at GH start was highest for patients with Turner syndrome ( $0.29 [95\% \text{ CI } 0.28 \text{ to } 0.29] \text{ mg/kg/week}$ ), and lowest for patients with OGHD ( $0.18 [95\% \text{ CI } 0.18 \text{ to } 0.19] \text{ mg/kg/week}$ ). Canadian mean GH doses were lower than those used in the USA (data not shown) and the global cohort (Supplemental Table 1).

Reported mean duration of GH treatment was 6.6 (95% CI 6.3 to 6.9) years overall, and was longest for patients with OGHD (8.0, 95% CI 7.5 to 8.4 years) and shortest for those with ISS (2.7, 95% CI 2.2 to 3.2 years; not all data shown). Duration of GH treatment was  $>4$  years for 556 patients (65.4%).

**Height data during growth hormone therapy**

Auxological data at baseline and 1 year for patients naïve to GH treatment at study entry are summarized in Table 2 for Canada (2a) and the global database (2b). For Canadian patients overall, mean height velocity SDS increased from  $-1.19$  (95% CI  $-1.43$  to  $-0.94$ ) at baseline to  $1.97$  (95% CI  $1.69$  to  $2.26$ ) at 1 year. All diagnostic groups had a mean gain in height SDS at 1 year, with the least gain in those with ISS ( $0.33 [95\% \text{ CI } 0.21 \text{ to } 0.45]$ ) and the greatest gain in patients with IGHD ( $0.60 [95\% \text{ CI } 0.46 \text{ to } 0.73]$ ).

Mean height SDS and height velocity SDS over the first 4 years of GH treatment are shown in Figure 1. For each diagnostic group, mean height velocity SDS increased in the first year and declined over subsequent years, as expected.



Auxological parameters for all patients who reached NAH are shown in Table 3a and 3b, and mean gain in height SDS is shown in Figure 2. NAH SDS was  $> -2$  for the majority of patients with OGHD and IGHD but for only about half of the patients with Turner syndrome or ISS. Mean age at baseline was lower and mean therapy duration to NAH was longer for patients with OGHD than for those with IGHD; however, this did not result in a greater mean change from baseline for height SDS (Figure 2).

### **Safety outcomes**

Of 850 GH-treated Canadian children included in the overall safety analysis (Table 4), 11 were reported to have died during the study; patient characteristics and cause of death are shown in Supplemental Table 2. The majority of deaths ( $n=7$  [64%]) were in patients with OGHD. Death was considered possibly related to GH treatment by the investigator for three patients, for whom the primary diagnosis was medulloblastoma ( $n=2$ ) or anaplastic astrocytoma ( $n=1$ ) and cause of death was tumor recurrence in each case.

SAEs were reported for 97 patients, with events in 19 patients considered related to GH treatment by the investigator (2.2% of the total safety population; see the footnote to Table 4). The GH-related SAEs were isolated events in individual patients, except for the aforementioned medulloblastoma recurrence in two patients (both with OGHD) and adenoidal hypertrophy in two patients (one with OGHD and one with Turner syndrome).

Among 833 GH-treated patients with at least one post-baseline visit, 587 (70.5%) had at least one TEAE reported (Table 4). TEAEs were reported more frequently for patients with OGHD than for those with IGHD or other diagnoses. The most frequently reported TEAEs for Canadian patients overall were headache and secondary (central) hypothyroidism, consistent with the known GH safety profile and an inherent risk of hypothyroidism due to the underlying diagnosis. TEAEs classified by the investigator as possibly GH-related occurred in 87 patients overall (10.4% of the study population).

**Interpretation**

The results of GeNeSIS indicated a positive treatment effect on height gain, both during the first 1–4 years of GH therapy and at NAH, and a reassuring safety profile both within Canada and globally. Among the 30 countries involved in GeNeSIS, Canada was the sixth largest contributor of patients, with 850 GH-treated patients (3.8%) out of approximately 22,000 globally. Currently approved pediatric indications in Canada are GHD (approved in 1987), Turner syndrome (1997), SGA (2006), ISS (2006) and SHOX deficiency (2008); chronic renal insufficiency is an approved indication for some GH formulations (1996) but not for the GH primarily used in GeNeSIS.

The majority of patients had GHD (Canada 61.9% vs. global 62.9% vs. USA 52.9%). However, the proportions with OGHD (44.6% of all diagnoses vs. global 13.3% vs. USA 10.9%) versus IGHD (17.3% vs. 49.4% vs. 41.7%) reflected a higher frequency of inclusion in Canada of patients with abnormal pituitary development and intracranial tumor. The proportion of patients with Turner syndrome in Canada was also higher than globally and in the USA (18.4% vs. 8.4% vs. 7.5%), which may, in part, have been attributable to enrollment in GeNeSIS of patients from a large Canadian clinical trial [4]. In addition, fewer patients in Canada than in the USA had ISS or were born SGA. This likely indicates a more conservative approach of endocrine specialists in Canada to administering GH to children with non-GHD conditions, with the exception of Turner syndrome. Also, ISS and SGA are privately funded in many provinces in Canada, whereas GHD is fully reimbursed by provincial programs.

Patients showed increased height velocity SDS within the first year, with a positive mean value maintained over the first 3–4 years of GH treatment, resulting in an increase in height SDS over time. Across all indications, growth response in the Canadian cohort was lower

than that seen in the global data. Differences in GH response may be, in part, attributable to our more conservative approach to treatment dosages compared with the global, and particularly the US, populations. The stimulated peak GH was higher in the global vs. the Canadian IGHD group. This could reflect inclusion of milder or transient forms of GHD in the global cohort compared with a more severely affected group of patients in Canada. The GH stimulation test result considered to indicate GHD is lower in Canada than in the USA.

Patients with Turner syndrome in Canada remained shorter than the global cohort at NAH, and percentages with NAH SDS within the normal range were lower than globally, consistent with past research showing NAH to be influenced by age at GH start, GH dose and concomitant estrogen treatment [6,35-37]. However, compared with global rates, patients with Turner syndrome in Canada had a similar height SDS gain from baseline to NAH of 0.96. This gain was consistent with the results from the Canadian randomized clinical trial and other studies of GH treatment in Turner syndrome [4,5,38]. The tendency of Canadian physicians to treat shorter patients with Turner syndrome may reflect parent/patient healthcare priorities, as previously published [37], although the impact of provincial funding decisions may also play a role.

TEAEs were reported more frequently for Canadian patients than for the global population (Canada 70.5% vs. global 30.1%), suggesting that physicians in Canada may be more vigilant in reporting adverse events than physicians in other countries. Indeed, the Canadian cohort was the second largest contributor of adverse events to the global database, surpassed only by the Netherlands, a country with an established national registry. Among the 850 patients in GeNeSIS in Canada, with mean treatment duration 6.6 years, 11 patients (1.3%) were reported to have died (standardized mortality rate of 3.0 [95% CI 1.5 to 5.4]). This was a higher frequency of death than reported in 21,106 patients in the global cohort with follow-up in study and known gender, who were GH-treated for a mean of 5.0 years (42 deaths [0.2%])

[21]. The Canadian cohort included a higher proportion of patients with OGHD (particularly with a history of intracranial tumor) than the global cohort. Of the 11 reported deaths, seven were children with a primary diagnosis of OGHD; four of the seven died because of cancer recurrence, and one patient previously treated with cranial irradiation died because of a second cancer. Analyses from various studies have indicated an increased risk of mortality in patients previously treated for a malignancy, irrespective of GH treatment [21,39-42]. Results from the Childhood Cancer Survivor Study (CCSS) indicate no association of death or tumor recurrence with GH treatment [42], supporting the assessment that these deaths were unlikely to be GH-related. Nevertheless, three of the deaths (2 recurrences of medulloblastoma and 1 anaplastic astrocytoma recurrence) were recorded by the investigators as being possibly related to GH treatment.

A previous analysis of GeNeSIS found no increased risk for primary cancers during study participation in patients with no previous cancer history when compared with general population cancer registries [16]. Similarly, the US Pediatric Endocrine Society Drug and Therapeutics Committee found no association between GH treatment and the risk of *de novo* cancer development in children with no prior history of or known predisposition to cancer [44].

Analyses from the large Safety and Appropriateness of Growth hormone treatments in Europe (SAGhE) cohort demonstrated an increased risk of mortality from a number of second malignancies in patients whose original diagnosis was cancer [45], with no clear raised risk in patients with growth failure without other major disease. Initial reports from the CCSS indicated that GH-treatment was associated with a higher relative risk for second neoplasms [39,45]. However, a recent analysis of the CCSS, with an extended period of follow-up, found no direct evidence to support an increased risk of second neoplasms of the central nervous system in GH-treated patients, who clearly have risk factors other than GH for

development of subsequent neoplasms [42]. Our observational study cannot resolve this question but the balance of evidence suggests that the risk of malignancy relates to the underlying condition rather than GH treatment.

## Limitations

This analysis of Canadian data from GeNeSIS is limited in that the study was open-label and observational; however, the data reflect the “real-world” clinical setting of GH treatment for a large patient cohort.

## Conclusion

This study of pediatric patients in Canada, who received GH treatment in an observational setting, showed that the major indication for GH treatment in Canada is OGHD. Overall effectiveness and safety results from the GH-treated Canadian cohort were generally consistent with those from other clinical trials and international surveillance databases. Approximately 80% of patients with OGHD or IGHD achieved a NAH within the normal range despite use of a lower dose of GH than the global GeNeSIS population, with smaller proportions achieving NAH within normal range for non-GHD conditions. The 11 reported deaths generally reflected the serious underlying etiology of GHD. While the current approach to GH treatment in Canada is more conservative than some other global practices, it appears efficacious and safe, but—as per international guidelines—continued monitoring of patients previously treated with GH is recommended [13].

**Acknowledgments:** The GeNeSIS program was supported by Eli Lilly and Company.

**Competing interests:** Cheri Deal has been involved with Phase 3 and/or Phase 4 studies with Eli Lilly and Company, Serono, Versartis, OPKO; invited lectureships sponsored by Novo-Nordisk, Eli Lilly and Company, Pfizer, EMD Serono, Merck-Serono; ad hoc consulting with EMD Serono, Novo-Nordisk, Merck-Serono, Versartis, OPKO, Zafgen; Grant for Growth

Innovation Scientific Advisory Board: Merck; was a member of the GeNeSIS International Advisory Board and has received honoraria and meeting expenses from Eli Lilly and Company. Susan Kirsch and Nan Jia are employees of Eli Lilly and Company. Jean-Pierre Chanoine has received honoraria (speaker fees and advisory board membership) from Eli Lilly and Company. Elizabeth Cummings has received grant support from Eli Lilly and Sanofi. Elizabeth Rosolowsky has received grant support from Eli Lilly and Company and has served on the advisory boards for Insulet and Medtronic. Christopher Child is an employee and stockholder of Eli Lilly and Company. Sarah Lawrence and Seth Marks have no competing interests.

**Investigators:** Additional GeNeSIS investigators were Jill Hamilton (Hospital for Sick Children, Toronto, Canada), Danièle Pacaud (Alberta Children’s Hospital and University of Calgary, Calgary, Canada), Susan Sanderson (Saint. John Regional Hospital, Saint John, New Brunswick, Canada), Susan Stock (private practice, North Vancouver, Canada), Cheril Clarson (Children’s Hospital, London Health Services Centre, London, Canada), Angelo Simone (private practice, Mississauga, Canada), Shayne Taback (Children's Hospital Research Institute of Manitoba, Winnipeg, Canada), Laurent Legault and Nancy Gagné (Montreal Children’s Hospital, Montreal, Canada), Dardye Eugene (Centre Hospitalier Universitaire du Québec, Québec, Canada), Khalil Khoury (Centre Hospitalier Universitaire de Sherbrooke, Sherbrooke, Canada) and Tracey Bridger (Janeway Child Health and Rehabilitation Centre, St John’s, Canada).

**Disclaimer:** Assistance with preparation and editorial review of the manuscript was provided by Dr Peter Bates, Cambridge Medical Writing Services, UK, and Caroline Spencer, Rx Communications, UK, funded by Eli Lilly and Company.

## References

1. Haymond M, Kappelgaard A-M, Czernichow P, et al.; Global Advisory Panel Meeting on the Effects of Growth Hormone. Early recognition of growth abnormalities permitting early intervention. *Acta Paediatr* 2013;102:787–96.
2. Audi L, Fernandez-Cancio M, Camats N, et al. Growth hormone deficiency: an update. *Minerva Endocrinol* 2013;38:1–16.
3. Deal C, Hasselmann C, Pfäffle RW, et al. Associations between pituitary imaging abnormalities and clinical and biochemical phenotypes in children with congenital growth hormone deficiency: data from an international observational study. *Horm Res Paediatr* 2013;79:283–92.
4. Stephure DK; Canadian Growth Hormone Advisory Committee. Impact of growth hormone supplementation on adult height in turner syndrome: results of the Canadian randomized controlled trial. *J Clin Endocrinol Metab* 2005;90:3360–6.
5. Benabbad I, Rosilio M, Child CJ, et al. Safety outcomes and near-adult height gain of growth hormone-treated children with SHOX deficiency: data from an observational study and a clinical trial. *Horm Res Paediatr* 2017;87:42–50.
6. Kappelgaard AM, Laursen T. The benefits of growth hormone therapy in patients with Turner syndrome, Noonan syndrome and children born small for gestational age. *Growth Horm IGF Res* 2011;21:305–13.
7. Deal CL, Tony M, Höybye C, et al.; 2011 Growth Hormone in Prader-Willi Syndrome Clinical Care Guidelines Workshop Participants. Growth hormone research society workshop summary: consensus guidelines for recombinant growth hormone therapy in Prader-Willi syndrome. *J Clin Endocrinol Metab* 2013;98:E1072–87.

8. Jung H, Rosilio M, Blum WF, et al. Growth hormone treatment for short stature in children born small for gestational age. *Adv Ther* 2008;25:951–78.

9. Hodson EM, Willis NS, Craig JC. Growth hormone for children with chronic kidney disease. *Cochrane Database Syst Rev* 2012;(2):CD003264.

10. Deodati A, Cianfarani S. Impact of growth hormone therapy on adult height of children with idiopathic short stature: systematic review. *Br Med J* 2011;342:c7157.

11. Loche S, Carta L, Ibba A, et al. Growth hormone treatment in non-growth hormone-deficient children. *Ann Pediatr Endocrinol Metab* 2014;19:1–7.

12. Säwendahl L, Maes M, Albertsson-Wikland K, et al. Long-term mortality and causes of death in isolated GHD, ISS, and SGA patients treated with recombinant growth hormone during childhood in Belgium, the Netherlands, and Sweden: preliminary report of 3 countries participating in the EU SAGhE study. *J Clin Endocrinol Metab* 2012;97:E213–7.

13. Allen DB, Backeljauw P, Bidlingmaier M, et al. GH safety workshop position paper: a critical appraisal of recombinant human GH therapy in children and adults. *Eur J Endocrinol* 2016;174:P1–9.

14. Growth Hormone Research Society. Consensus guidelines for the diagnosis and treatment of growth hormone (GH) deficiency in childhood and adolescence: summary statement of the GH Research Society. *J Clin Endocrinol Metab* 2000;85:3990–3.

15. Bell J, Parker KL, Swinford RD, et al. Long-term safety of recombinant human growth hormone in children. *J Clin Endocrinol Metab* 2010;95:167–77.

16. Child CJ, Zimmermann AG, Jia N, et al. Assessment of primary cancer incidence in growth hormone-treated children: comparison of a multinational prospective observational study with population databases. *Horm Res Paediatr* 2016;85:198–206.



17. Wilton P, Mattsson AF, Darendeliler F. Growth hormone treatment in children is not associated with an increase in the incidence of cancer: experience from KIGS (Pfizer International Growth Database). *J Pediatr* 2010;157:265–70.
18. Säwendahl L, Pournara E, Pedersen BT, et al. Is safety of childhood growth hormone therapy related to dose? Data from a large observational study. *Eur J Endocrinol* 2016;174:681–91.
19. Ranke MB, LindbergA, Tanaka T, et al. Baseline characteristics and gender differences in prepubertal children treated with growth hormone in Europe, USA, and Japan: 25 Years' KIGS experience (1987-2012) and review. *Horm Res Paediatr* 2017;87(1):30–41.
20. Wyatt D. Lessons from the National Cooperative Study. *Eur J Endocrinol* 2004;151:S55–9.
21. Quigley CA, Child CJ, Zimmerman AG, et al. Mortality in children receiving growth hormone treatment for growth disorders: Data from the GeNeSIS observational program. *J Clin Endocrinol Metab* 2017;102(9):3195–205.
22. Guyda H, Friesen H, Bailey JD, et al. Medical Research Council of Canada therapeutic trial of human growth hormone: first 5 years of therapy. *CMAJ* 1975;112:1301–9.
23. Taback SP, Dean H. Mortality in Canadian Children with growth hormone (GGH) deficiency receiving GH therapy 1967-1992. The Canadian Growth Hormone Advisory Committee. *J Clin Endocrinol Metab* 1996;81(5):1693–6.
24. Guyda H, Dean H. Intermittent GH administration in growth hormone deficiency. In: Laron Z, Butenault O, Raiti S, editors. *Clinical Use of Growth Hormone: Present and Future Aspects*. New York: S Karger AG; 1987:1661-71.
25. Cappa M, Iughetti L, Loche S, et al.; GeNeSIS National Board on behalf of the GeNeSIS Italian Investigators. Efficacy and safety of growth hormone treatment in

- children with short stature: the Italian cohort of the GeNeSIS clinical study. *J Endocrinol Invest* 2016;39(6):667–77. doi: 10.1007/s40618-015-0418-0.
26. Luzuriaga Tomás C, Oyarzabal Irigoyen M, Caveda Cepas E, et al.; el grupo de investigadores españoles del estudio GeNeSIS. Safety and efficacy of growth hormone treatment: GeNeSIS study in Spain. *An Pediatr (Barc)* 2016;84(3):139–47.
  27. Tai S, Tanaka T, Hasegawa T, et al. An observational study of the effectiveness and safety of growth hormone (Humatrope®) treatment in Japanese children with growth hormone deficiency or Turner syndrome. *Endo J* 2013;60(1):57–64.
  28. Fujieda K, Tanaka T, Takano K, et al.; KIGS Japan Scientific Committee. Adult height after growth hormone treatment in Japanese children with idiopathic growth hormone deficiency: analysis from the KIGS Japan database. *J Pediatr Endocrinol Metab* 2011;24(7-8):457–62.
  29. Cohen P, Rogol AD, Deal CL, et al.; 2007 ISS Consensus Workshop participants. Consensus statement on the diagnosis and treatment of children with idiopathic short stature: a summary of the Growth Hormone Research Society, the Lawson Wilkins Pediatric Endocrine Society, and the European Society for Paediatric Endocrinology Workshop. *J Clin Endocrinol Metab* 2008;93:4210–7.
  30. Ogden CL, Kuczmarski RJ, Flegal KM, et al. Centers for Disease Control and Prevention 2000 growth charts for the United States: improvements to the 1977 National Center for Health Statistics version. *Pediatrics* 2002;109:45–60.
  31. Preece MA. Evaluation of growth and development. In: Holliday MA, Barratt TM, Avner ED, et al., editors. *Pediatric Nephrology*. 3rd edition. Baltimore: Williams and Wilkins;1994:378–96.
  32. Marshall WA, Tanner JM. Variations in the pattern of pubertal changes in boys. *Arch Dis Child* 1970;45:13–23.

33. Marshall WA, Tanner JM. Variations in pattern of pubertal changes in girls. *Arch Dis Child* 1969;44:291–303.
34. Health Canada. Guidance documents for industry: reporting adverse reactions to marketed health products. Ottawa, ON: Health Canada; 2011. Available: <https://www.canada.ca/en/health-canada/services/drugs-health-products/reports-publications/medeffect-canada/guidance-document-industry-reporting-adverse-reactions-marketed-health-products-health-canada-2011.html> (accessed 2017 Sep 07)
35. Ross JL, Quigley CA, Cao D, et al. Growth hormone plus childhood low-dose estrogen in Turner's syndrome. *N Engl J Med* 2011;364:1230–42.
36. Chernausek SD, Attie KM, Cara JF, et al. Growth hormone therapy of Turner syndrome: the impact of age of estrogen replacement on final height. Genentech, Inc., Collaborative Study Group. *J Clin Endocrinol Metab* 2000;85:2439–45.
37. Khatchadourian K, Huot C, Alos N, et al. Impact of patient characteristics and clinical factors on the decision to initiate growth hormone treatment in Turner syndrome. *Horm Res* 2008;70(5):300–08.
38. Quigley CA, Crowe BJ, Anglin DG, et al. Growth hormone and low dose estrogen in Turner syndrome: results of a United States multi-center trial to near-final height. *J Clin Endocrinol Metab* 2002;87:2033–41.
39. Sklar CA, Mertens AC, Mitby P, et al. Risk of disease recurrence and second neoplasms in survivors of childhood cancer treated with growth hormone: a report from the Childhood Cancer Survivor Study. *J Clin Endocrinol Metab* 2002;87:3136–41.
40. Berglund A, Gravholt CH, Olsen MS, et al. Growth hormone replacement does not increase mortality in patients with childhood-onset growth hormone deficiency. *Clin Endocrinol (Oxf)* 2015;83:677–83.

1  
2  
3 41. Packer RJ, Boyett JM, Janss AJ, et al. Growth hormone replacement therapy in children  
4 with medulloblastoma: use and effect on tumor control. *J Clin Oncol* 2001;19:480–7.  
5  
6  
7 42. Patterson BC, Chen Y, Sklar CA, et al. Growth hormone exposure as a risk factor for  
8 the development of subsequent neoplasms of the central nervous system: a report from  
9 the childhood cancer survivor study. *J Clin Endocrinol Metab* 2014;99:2030–7.  
10  
11  
12  
13 43. Raman S, Grimberg A, Waguespack SG, et al. Risk of neoplasia in pediatric patients  
14 receiving growth hormone therapy: A report from the Pediatric Endocrine Society Drug  
15 and Therapeutics Committee. *J Clin Endocrinol Metab* 2015;100(6):2192–203. doi:  
16 10.1210/jc.2015-1002.  
17  
18  
19  
20  
21  
22 44. Swerdlow AJ, Cooke R, Beckers D, et al. Cancer risks in patients treated with growth  
23 hormone in childhood: the SAGhE European cohort study. *J Clin Endocrinol Metab*.  
24 2017;102:1661–72.  
25  
26  
27  
28  
29 45. Ergun-Longmire B, Mertens AC, Mitby P, et al. Growth hormone treatment and risk of  
30 second neoplasms in the childhood cancer survivor. *J Clin Endocrinol Metab*  
31 2006;91(9):3494–8.  
32  
33  
34  
35  
36  
37  
38  
39  
40  
41  
42  
43  
44  
45  
46  
47  
48  
49  
50  
51  
52  
53  
54  
55  
56  
57  
58  
59  
60

**Figure 1:** Height velocity standard deviation score (SDS; open squares) and height SDS (closed circles) over the first 4 years of growth hormone (GH) treatment for patients in Canada (solid lines) and the global population (broken lines) with data for each year and who were GH treatment-naïve at study entry, for all patients and for evaluable diagnostic groups. Values show means with 95% confidence intervals. SDS corresponds to the following height percentiles on a standard height of age growth curve:  $-3\text{SDS} = 0.2\%$ ;  $-2\text{SDS} = 2.3\%$ ;  $-1\text{SDS} = 16\%$ ;  $0\text{SDS} = 50\%$ ;  $+2\text{SDS} = 97.7\%$ ;  $+3\text{SDS} = 99.8\%$ . Data from patients with idiopathic short stature are not shown because of the small number of patients in this diagnostic group in Canada with relevant data ( $n=9$ ).

**Figure 2:** Change in height standard deviation score (SDS) from baseline to near-adult height for all growth hormone (GH)-treated patients and by diagnostic group in Canada (solid bars) and the global population (striped bars). Note: GHD = growth hormone deficiency. SDS correspond to the following height percentiles on a standard height of age growth curve:  $-3\text{SDS} = 0.2\%$ ;  $-2\text{SDS} = 2.3\%$ ;  $-1\text{SDS} = 16\%$ ;  $0\text{SDS} = 50\%$ ;  $+2\text{SDS} = 97.7\%$ ;  $+3\text{SDS} = 99.8\%$ . Data from patients with idiopathic short stature are not shown because of the small number of patients in this diagnostic group in Canada with relevant data ( $n=10$ ).

Fig 1a

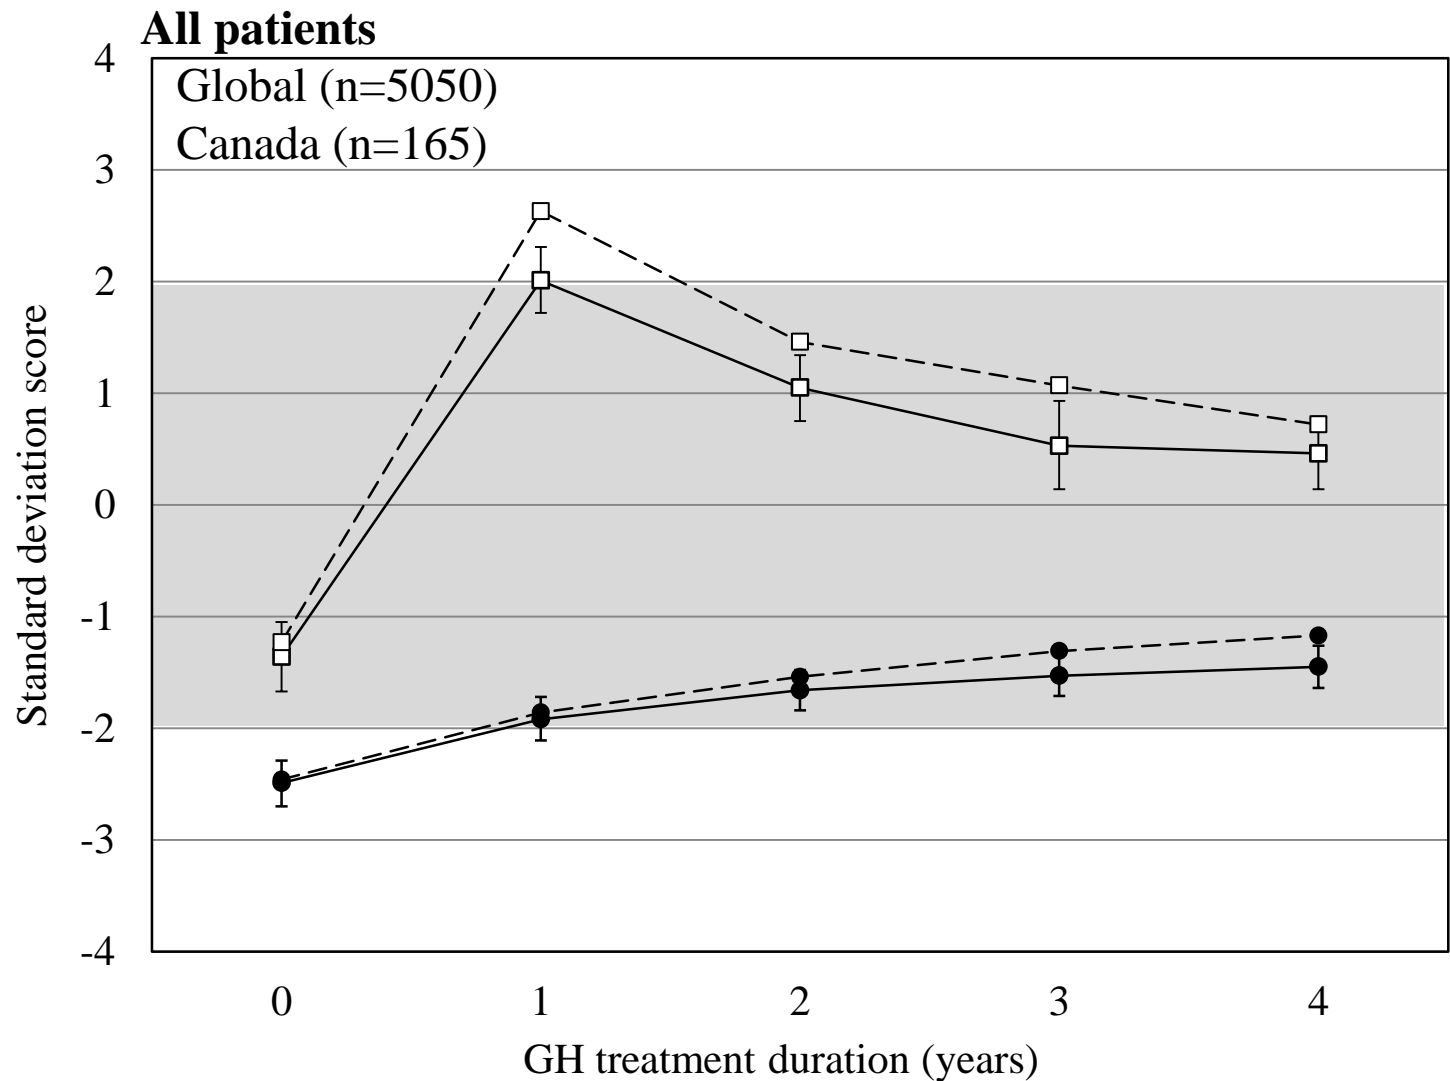

Fig 1b

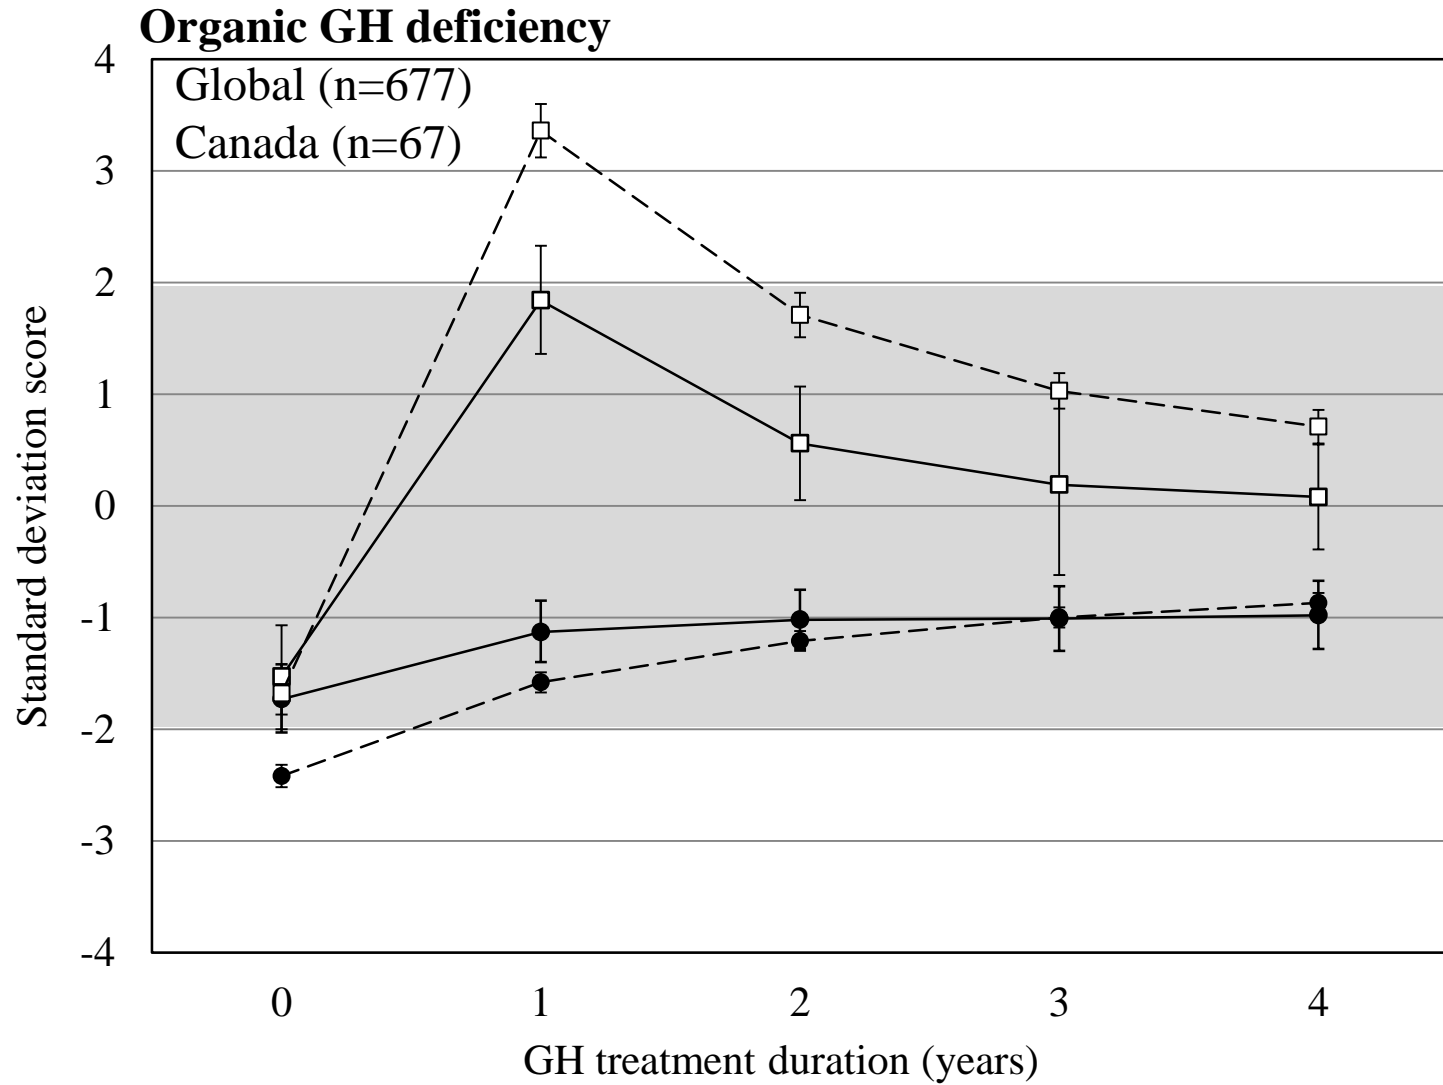

Fig 1c

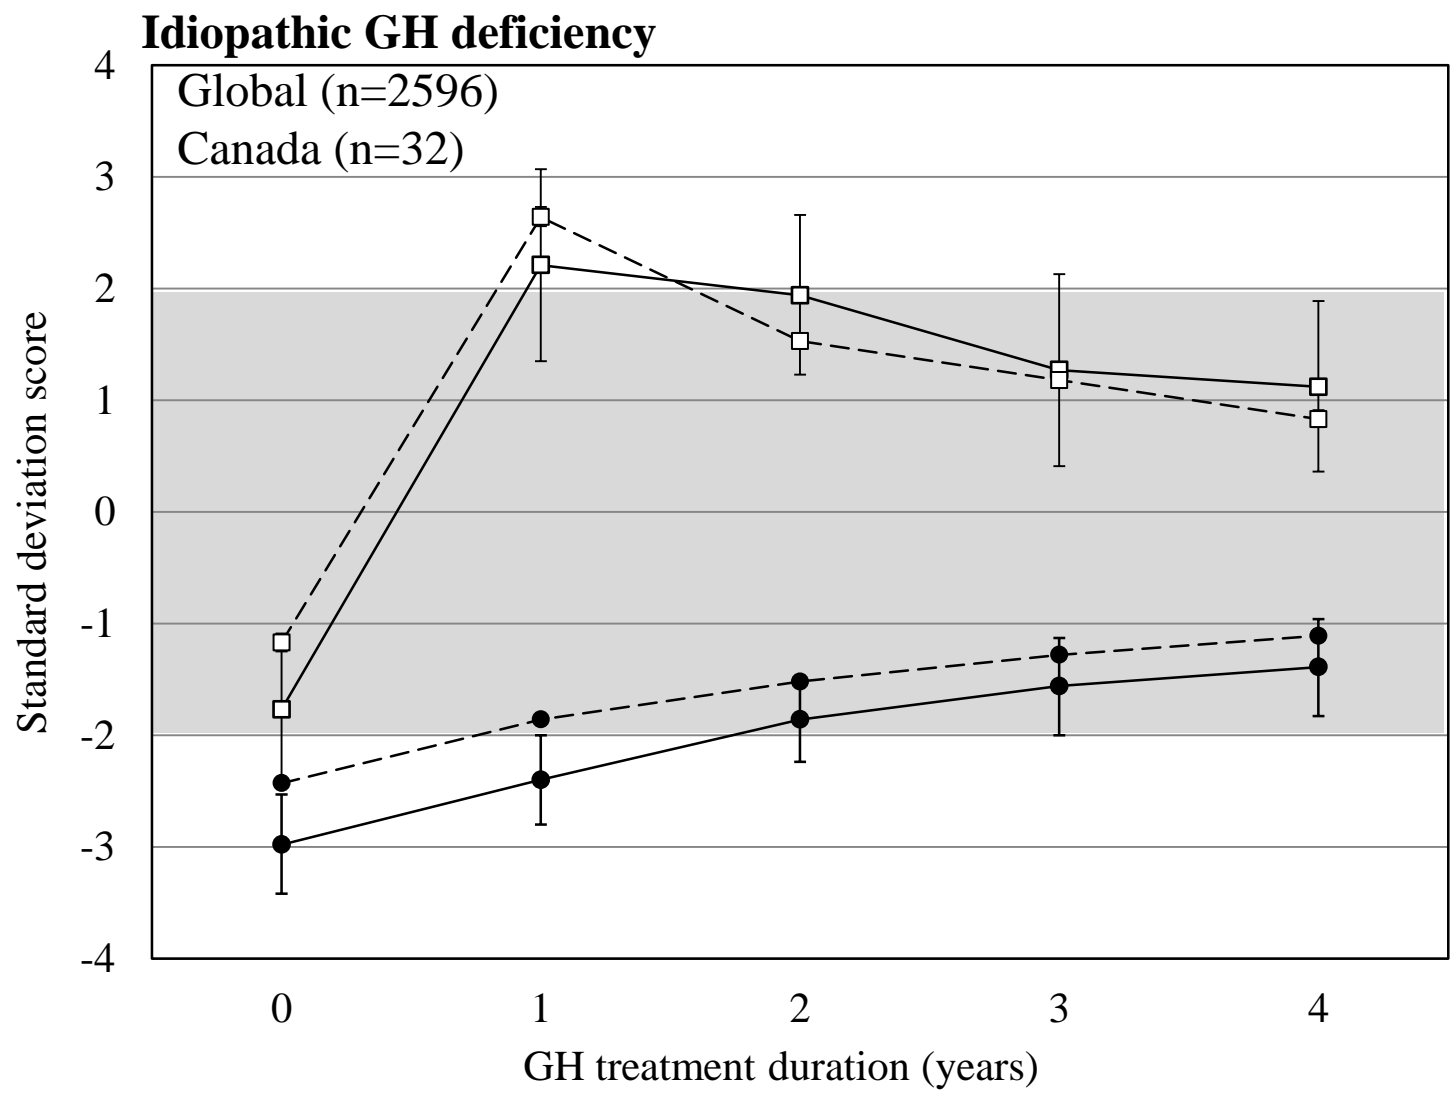



Fig 1d

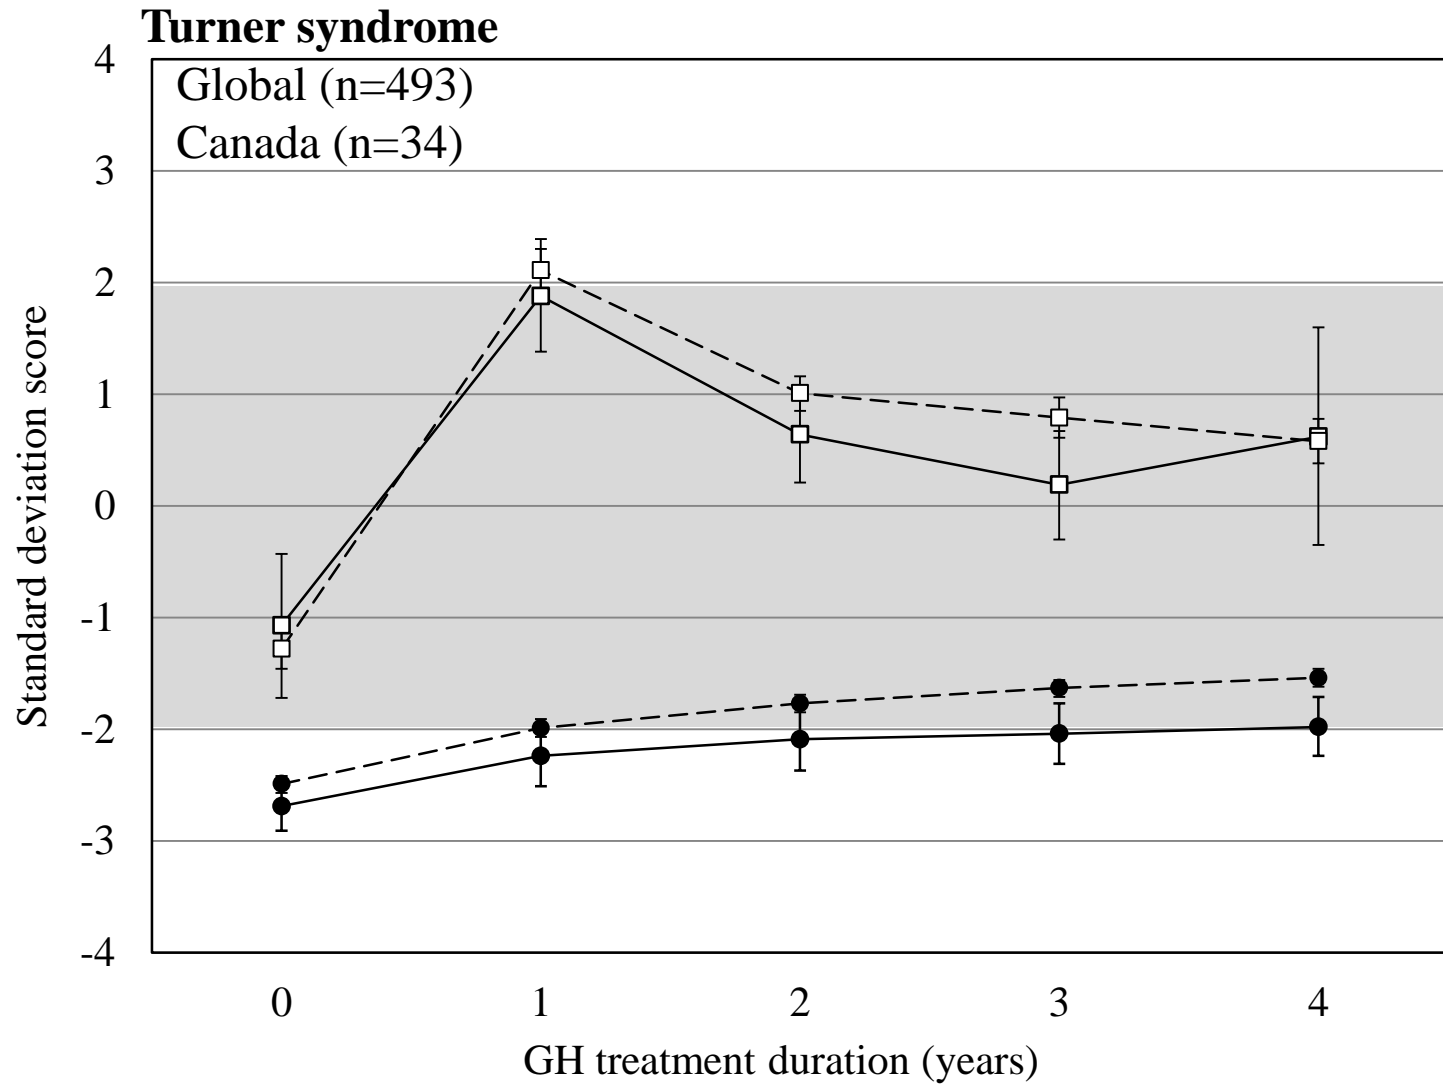

Fig 2

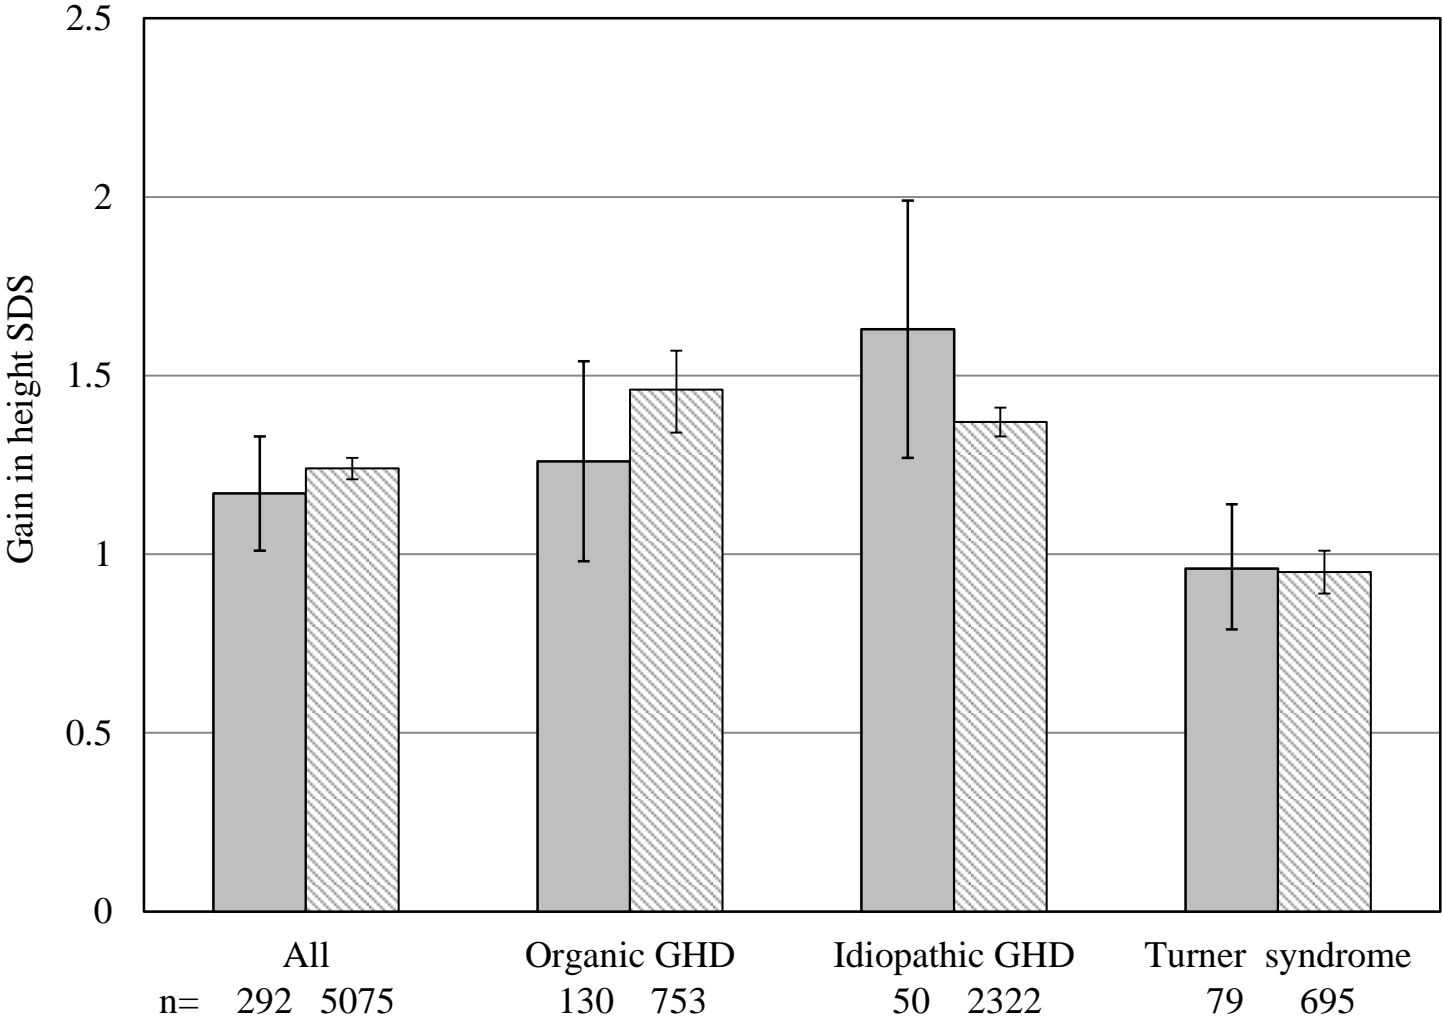

Canada = solid; Global = striped

**Table 1:** Reported primary diagnosis in 850 children in Canada and 9806 children in the USA treated with growth hormone for short stature<sup>a</sup>

| Primary diagnosis                                      | Canada<br>n (% <sup>b</sup> ) | USA<br>n (% <sup>b</sup> ) |
|--------------------------------------------------------|-------------------------------|----------------------------|
| GH deficiency (GHD)                                    | 526 (61.9)                    | 5184 (52.9)                |
| Idiopathic                                             | 147 (17.3)                    | 4088 (41.7)                |
| Classic                                                | 133 (15.6)                    | 3198 (32.6)                |
| Neurosecretory dysfunction                             | 4 (0.5)                       | 533 (5.4)                  |
| Organic                                                | 379 (44.6)                    | 1065 (10.9)                |
| Congenital                                             | 243 (28.6)                    | 665 (6.8)                  |
| Abnormal pituitary development                         | 184 (21.6) <sup>c</sup>       | 522 (5.3)                  |
| Clinical syndromes                                     | 35 (4.1) <sup>d</sup>         | 57 (0.6)                   |
| Genetic defect                                         | 6 (0.7)                       | 16 (0.2)                   |
| Other CNS malformations                                | 10 (1.2)                      | 53 (0.5)                   |
| Acquired                                               | 136 (16.0)                    | 400 (4.1)                  |
| Intracranial tumor                                     | 102 (12.0) <sup>e</sup>       | 273 (2.8)                  |
| Cranial irradiation                                    | 13 (1.5) <sup>f</sup>         | 23 (0.2)                   |
| CNS trauma/infection                                   | 2 (0.2)                       | 16 (0.2)                   |
| Histiocytosis                                          | 2 (0.2)                       | 17 (0.2)                   |
| Other                                                  | 14 (1.6)                      | 71 (0.7)                   |
| Other defects of GH axis (e.g. bioinactive GH)         | 0 (0.0)                       | 31 (0.3)                   |
| SHOX deficiency-associated syndromes                   | 162 (19.1)                    | 804 (8.2)                  |
| Turner syndrome                                        | 156 (18.4)                    | 737 (7.5)                  |
| Mixed gonadal dysgenesis                               | 3 (0.4)                       | 6 (0.1)                    |
| Léri-Weill syndrome                                    | 2 (0.2)                       | 21 (0.2)                   |
| SHOX deficiency – other                                | 1 (0.1)                       | 40 (0.4)                   |
| Other causes of short stature or reduced linear growth | 61 (7.2)                      | 540 (5.5)                  |
| Genetic defect                                         | 43 (5.1)                      | 273 (2.8)                  |
| Other                                                  | 18 (2.1) <sup>h</sup>         | 267 (2.7)                  |
| Idiopathic short stature                               | 38 (4.5) <sup>i</sup>         | 2594 (26.5) <sup>j</sup>   |
| Small for gestational age                              | 19 (2.2)                      | 353 (3.6)                  |
| Skeletal dysplasia                                     | 2 (0.2)                       | 19 (0.2)                   |
| No GHD <sup>g</sup>                                    | 19 (2.2)                      | 52 (0.5)                   |
| Prader-Willi syndrome                                  | 16 (1.9)                      | 33 (0.3)                   |
| Other                                                  | 3 (0.4)                       | 19 (0.2)                   |

Note: CNS = central nervous system, GH = growth hormone, GHD = growth hormone deficiency, SHOX = short stature homeobox.

Investigator-provided diagnoses were assigned to a pre-defined hierarchical diagnostic tree to classify the primary cause of short stature and establish appropriate diagnostic groups; however, more detailed levels of diagnosis were not always provided (so n of subdiagnoses may not always sum to n of main diagnostic groups).

1  
2  
3  
4  
5  
6  
7  
8  
9  
10  
11  
12  
13  
14  
15  
16  
17  
18  
19  
20  
21  
22  
23  
24  
25  
26  
27  
28  
29  
30  
31  
32  
33  
34  
35  
36  
37  
38  
39  
40  
41  
42  
43  
44  
45  
46  
47  
48  
49  
50  
51  
52  
53  
54  
55  
56  
57  
58  
59  
60

<sup>a</sup>Diagnosis was unknown for 23 children in Canada and 229 in the USA.

<sup>b</sup>Percentage of total number of patients in country cohort.

<sup>c</sup>Includes patients with primary diagnoses of ectopic posterior pituitary (76), septo-optic dysplasia (67), pituitary hypoplasia (18), pituitary aplasia (10), pituitary stalk defect (8).

<sup>d</sup>Includes patients with primary diagnoses of Prader-Willi syndrome (30), mid-line palatal defect (3), other (2).

<sup>e</sup>Includes patients with primary diagnoses of medulloblastoma (43), craniopharyngioma (26), glioma (9), astrocytoma (7), germinoma (4), primitive neuroectodermal (2), ependymoma (1), pituitary adenoma (1), unspecified (9).

<sup>f</sup>Treatment for leukemia (12), medulloblastoma (1).

<sup>g</sup>A small number of patients, indicated as not having GHD by the investigator, were enrolled with complex diagnoses that, following the structure of the case report form diagnostic module, would routinely be recorded under GHD; assignment of no GHD status to these cases means that in general they were not included in efficacy analyses of the main GeNeSIS diagnostic groups but were included in safety-related analyses.

<sup>h</sup>Includes patients with primary diagnoses of Noonan syndrome (4), chronic renal failure (2), glucocorticoid therapy (2), rheumatoid arthritis (1), inflammatory bowel disease (1), other unspecified (8).

<sup>i</sup>Includes children with primary diagnoses of constitutional delay of growth and familial short stature (7).

<sup>j</sup>Includes children with primary diagnoses of constitutional delay of growth and familial short stature (43)

**Table 2:** Patient characteristics and auxological data at baseline and after 1 year of growth hormone treatment, by primary diagnostic category (patients naïve to growth hormone treatment at study entry and with baseline and 1-year height measurement available)

a) Canada

|                                        | OGHD<br>n=89           | IGHD<br>n=57           | Turner syndrome<br>n=44 | Idiopathic short stature<br>n=25 | Small for gestational age<br>n=5 |
|----------------------------------------|------------------------|------------------------|-------------------------|----------------------------------|----------------------------------|
| Baseline                               |                        |                        |                         |                                  |                                  |
| Males (%)                              | 61%                    | 67%                    | –                       | 84%                              | 80%                              |
| Age (years)                            | 8.9 (7.8 to 10.0)      | 11.3 (10.2 to 12.4)    | 9.6 (8.5 to 10.6)       | 12.9 (11.8 to 14.0)              | 6.3 (3.7 to 9.0)                 |
| Height SDS                             | –1.87 (–2.13 to –1.60) | –2.58 (–2.91 to –2.25) | –2.76 (–2.97 to –2.55)  | –2.57 (–2.96 to –2.18)           | –4.02 (–5.40 to –2.65)           |
| Height velocity (cm/year)              | 5.17 (4.12 to 6.22)    | 4.22 (3.39 to 5.04)    | 4.96 (4.24 to 5.67)     | 4.58 (3.78 to 5.37)              | 6.32 (3.15 to 9.49)              |
| Height velocity SDS                    | –1.65 (–2.05 to –1.24) | –1.55 (–2.04 to –1.05) | –1.01 (–1.54 to –0.47)  | –0.61 (–1.58 to 0.35)            | 0.31 (–4.70 to 5.32)             |
| Target height SDS                      | 0.25 (0.03 to 0.47)    | –0.37 (–0.64 to –0.10) | 0.18 (–0.04 to 0.40)    | –0.44 (–0.72 to –0.15)           | –0.62 (–1.26 to 0.03)            |
| Target height SDS deficit <sup>a</sup> | –2.19 (–2.54 to –1.84) | –2.22 (–2.62 to –1.83) | –2.92 (–3.18 to –2.66)  | –2.13 (–2.55 to –1.72)           | –3.41 (–5.16 to –1.65)           |
| Stimulated peak GH (µg/l)              | 4.3 (2.4 to 6.1)       | 4.4 (3.6 to 5.3)       | NA                      | 25.0 (17.2 to 32.8)              | NA                               |
| GH dose (mg/kg/week)                   | 0.18 (0.17 to 0.19)    | 0.18 (0.17 to 0.19)    | 0.29 (0.28 to 0.30)     | 0.22 (0.19 to 0.25)              | 0.22 (0.15 to 0.29)              |
| Year 1                                 |                        |                        |                         |                                  |                                  |
| Height SDS                             | –1.30 (–1.54 to –1.05) | –1.97 (–2.29 to –1.65) | –2.28 (–2.54 to –2.03)  | –2.24 (–2.64 to –1.83)           | –3.45 (–4.75 to –2.15)           |
| Height velocity (cm/year)              | 9.30 (8.28 to 10.33)   | 8.79 (8.14 to 9.44)    | 7.84 (7.28 to 8.40)     | 7.31 (6.33 to 8.28)              | 7.24 (5.59 to 8.90)              |
| Height velocity SDS                    | 1.72 (1.31 to 2.13)    | 2.20 (1.58 to 2.81)    | 2.54 (1.54 to 3.53)     | 1.47 (0.76 to 2.17)              | 1.49 (–0.12 to 3.10)             |
| Height SDS gain                        | 0.59 (0.43 to 0.76)    | 0.60 (0.46 to 0.73)    | 0.50 (0.38 to 0.61)     | 0.33 (0.21 to 0.45)              | 0.57 (0.14 to 1.00)              |
| Target height SDS deficit <sup>a</sup> | –1.60 (–1.93 to –1.27) | –1.61 (–1.99 to –1.24) | –2.44 (–2.72 to –2.16)  | –1.80 (–2.23 to –1.36)           | –2.83 (–4.46 to –1.20)           |
| GH dose (mg/kg/week)                   | 0.19 (0.18 to 0.20)    | 0.19 (0.18 to 0.20)    | 0.30 (0.29 to 0.31)     | 0.24 (0.21 to 0.27)              | 0.27 (0.21 to 0.33)              |

b) All countries combined (including Canada)

|  | OGHD<br>n=1210 | IGHD<br>n=5974 | Turner syndrome<br>n=886 | Idiopathic short stature<br>n=1353 | Small for gestational age<br>n=756 |
|--|----------------|----------------|--------------------------|------------------------------------|------------------------------------|
|--|----------------|----------------|--------------------------|------------------------------------|------------------------------------|

1  
2  
3  
4  
5  
6  
7  
8  
9  
10  
11  
12  
13  
14  
15  
16  
17  
18  
19  
20  
21  
22  
23  
24  
25  
26  
27  
28  
29  
30  
31  
32  
33  
34  
35  
36  
37  
38  
39  
40  
41  
42  
43  
44  
45  
46  
47

|                                        |                        |                        |                        |                        |                        |
|----------------------------------------|------------------------|------------------------|------------------------|------------------------|------------------------|
| Baseline                               |                        |                        |                        |                        |                        |
| Males (%)                              | 63%                    | 67%                    | –                      | 71%                    | 54%                    |
| Age (years)                            | 8.8 (8.5 to 9.1)       | 10.3 (10.2 to 10.4)    | 9.2 (9.0 to 9.4)       | 11.5 (11.3 to 11.6)    | 8.6 (8.3 to 8.8)       |
| Height SDS                             | –2.42 (–2.50 to –2.34) | –2.39 (–2.41 to –2.37) | –2.56 (–2.62 to –2.50) | –2.36 (–2.40 to –2.32) | –2.62 (–2.68 to –2.56) |
| Height velocity (cm/year)              | 4.54 (4.32 to 4.75)    | 4.70 (4.64 to 4.77)    | 4.86 (4.66 to 5.06)    | 4.81 (4.65 to 4.96)    | 5.22 (5.02 to 5.41)    |
| Height velocity SDS                    | –1.56 (–1.70 to –1.42) | –0.99 (–1.04 to –0.93) | –1.11 (–1.26 to –0.96) | –0.72 (–0.84 to –0.60) | –0.84 (–0.99 to –0.69) |
| Target height SDS                      | –0.06 (–0.11 to 0.00)  | –0.55 (–0.57 to –0.53) | 0.07 (0.01 to 0.13)    | –0.54 (–0.59 to –0.50) | –0.64 (–0.70 to –0.58) |
| Target height SDS deficit <sup>a</sup> | –2.42 (–2.50 to –2.33) | –1.84 (–1.86 to –1.81) | –2.62 (–2.69 to –2.55) | –1.82 (–1.87 to –1.76) | –1.98 (–2.07 to –1.90) |
| Stimulated peak GH (µg/l)              | 4.5 (4.1 to 4.8)       | 8.2 (8.0 to 8.4)       | N/A                    | 16.9 (16.3 to 17.4)    | 14.1 (13.1 to 15.1)    |
| GH dose (mg/kg/week)                   | 0.22 (0.21 to 0.22)    | 0.23 (0.23 to 0.24)    | 0.31 (0.31 to 0.32)    | 0.32 (0.32 to 0.33)    | 0.27 (0.27 to 0.28)    |
| Year 1                                 |                        |                        |                        |                        |                        |
| Height SDS                             | –1.65 (–1.72 to –1.58) | –1.85 (–1.87 to –1.83) | –2.10 (–2.16 to –2.04) | –1.87 (–1.91 to –1.82) | –2.05 (–2.11 to –2.00) |
| Height velocity (cm/year)              | 9.76 (9.54 to 9.98)    | 8.79 (8.73 to 8.85)    | 7.83 (7.70 to 7.97)    | 8.63 (8.51 to 8.76)    | 8.52 (8.37 to 8.68)    |
| Height velocity SDS                    | 3.21 (3.02 to 3.40)    | 2.48 (2.42 to 2.54)    | 2.26 (2.07 to 2.45)    | 2.38 (2.26 to 2.50)    | 2.34 (2.19 to 2.49)    |
| Height SDS gain                        | 0.78 (0.74 to 0.82)    | 0.56 (0.55 to 0.57)    | 0.48 (0.46 to 0.51)    | 0.52 (0.50 to 0.54)    | 0.58 (0.55 to 0.61)    |
| Target height SDS deficit <sup>a</sup> | –1.63 (–1.70 to –1.55) | –1.29 (–1.32 to –1.27) | –2.16 (–2.23 to –2.09) | –1.31 (–1.37 to –1.26) | –1.41 (–1.49 to –1.33) |
| GH dose (mg/kg/week)                   | 0.23 (0.22 to 0.23)    | 0.25 (0.25 to 0.25)    | 0.32 (0.32 to 0.33)    | 0.35 (0.35 to 0.36)    | 0.29 (0.29 to 0.30)    |

Note: GH = growth hormone, IGHD = idiopathic growth hormone deficiency, OGHG = organic growth hormone deficiency, NA = data available for <60% of patients, SDS = standard deviation score.  
Data show mean (95% confidence interval); patient numbers are for those with height SDS at baseline and 1 year, but not all patients had all other information.  
<sup>a</sup>Height SDS minus target height SDS.

**Table 3:** Characteristics and auxological data at baseline and at near-adult height for patients with idiopathic growth hormone deficiency, organic growth hormone deficiency or Turner syndrome, who were either growth hormone treated or growth hormone naïve at study entry

a) Canada

|                                        | All patients<br>(n=293) <sup>a</sup> | OGHD<br>(n=131) <sup>b</sup> | IGHD<br>(n=50) <sup>c</sup> | Turner syndrome<br>(n=79) | Idiopathic short stature<br>(n=10) <sup>d</sup> |
|----------------------------------------|--------------------------------------|------------------------------|-----------------------------|---------------------------|-------------------------------------------------|
| <b>Baseline</b>                        |                                      |                              |                             |                           |                                                 |
| Age                                    | 10.2 (9.8 to 10.6)                   | 9.2 (8.5 to 9.9)             | 11.4 (10.4 to 12.5)         | 10.3 (9.8 to 10.9)        | 12.8 (11.3 to 14.4)                             |
| Height SDS                             | -2.62 (-2.78 to -2.46)               | -2.29 (-2.57 to -2.00)       | -2.70 (-3.06 to -2.33)      | -2.99 (-3.15 to -2.83)    | -2.52 (-3.25 to -1.79)                          |
| Target height SDS deficit <sup>e</sup> | -2.51 (-2.69 to -2.32)               | -2.32 (-2.62 to -2.02)       | -2.14 (-2.56 to -1.71)      | -2.91 (-3.11 to -2.71)    | -1.81 (-2.61 to -1.01)                          |
| Height velocity SDS                    | -1.49 (-1.71 to -1.27)               | -1.89 (-2.23 to -1.54)       | -1.29 (-1.75 to -0.83)      | -1.16 (-1.44 to -0.89)    | -0.25 (-1.32 to 0.83)                           |
| GH dose (mg/kg/week)                   | 0.22 (0.21 to 0.23)                  | 0.18 (0.17 to 0.18)          | 0.20 (0.17 to 0.23)         | 0.29 (0.28 to 0.29)       | 0.24 (0.18 to 0.30)                             |
| Stimulated peak GH (µg/l)              | 4.73 (3.99 to 5.47)                  | 2.90 (2.48 to 3.32)          | 4.15 (3.36 to 4.94)         | NA                        | 19.41 (14.65 to 24.18)                          |
| <b>NAH</b>                             |                                      |                              |                             |                           |                                                 |
| Age                                    | 17.8 (17.6 to 17.9)                  | 18.1 (17.8 to 18.3)          | 17.6 (17.1 to 18.1)         | 17.6 (17.3 to 17.9)       | 17.2 (15.6 to 18.9)                             |
| Height SDS                             | -1.42 (-1.56 to -1.27)               | -0.95 (-1.15 to -0.75)       | -1.07 (-1.38 to -0.76)      | -2.04 (-2.24 to -1.83)    | -2.02 (-2.89 to -1.14)                          |
| NAH SDS – baseline height SDS          | 1.17 (1.01 to 1.33)                  | 1.26 (0.98 to 1.54)          | 1.63 (1.27 to 1.99)         | 0.96 (0.78 to 1.13)       | 0.50 (-0.35 to 1.35)                            |
| Target height SDS deficit <sup>f</sup> | -1.28 (-1.44 to -1.13)               | -0.93 (-1.15 to -0.71)       | -0.52 (-0.80 to -0.24)      | -1.94 (-2.16 to -1.72)    | -1.31 (-2.29 to -0.32)                          |
| GH therapy duration (years)            | 6.46 (6.01 to 6.90)                  | 7.68 (6.93 to 8.44)          | 5.45 (4.48 to 6.42)         | 5.71 (5.18 to 6.25)       | 3.19 (1.97 to 4.42)                             |
| Last GH dose (mg/kg/week)              | 0.22 (0.21 to 0.23)                  | 0.17 (0.16 to 0.18)          | 0.20 (0.19 to 0.22)         | 0.29 (0.28 to 0.30)       | 0.24 (0.18 to 0.30)                             |
| Near-adult height SDS > -2 (%)         | 66%                                  | 79%                          | 80%                         | 46%                       | 50%                                             |

b) All countries combined (including Canada)

|                                        | All patients<br>(n=5076) <sup>g</sup> | OGHD<br>(n=754) <sup>h</sup> | IGHD<br>(n=2322) <sup>i</sup> | Turner syndrome<br>(n=695) | Idiopathic short stature<br>(n=552) <sup>j</sup> |
|----------------------------------------|---------------------------------------|------------------------------|-------------------------------|----------------------------|--------------------------------------------------|
| Baseline                               |                                       |                              |                               |                            |                                                  |
| Age                                    | 10.9 (10.8 to 11.0)                   | 9.8 (9.5 to 10.1)            | 11.2 (11.1 to 11.3)           | 10.0 (9.8 to 10.3)         | 12.3 (12.0 to 12.5)                              |
| Height SDS                             | -2.42 (-2.45 to -2.40)                | -2.27 (-2.38 to -2.17)       | -2.38 (-2.41 to -2.34)        | -2.65 (-2.71 to -2.58)     | -2.37 (-2.43 to -2.30)                           |
| Target height SDS deficit <sup>e</sup> | -2.02 (-2.06 to -1.99)                | -2.29 (-2.40 to -2.17)       | -1.80 (-1.85 to -1.76)        | -2.69 (-2.77 to -2.61)     | -1.74 (-1.83 to -1.65)                           |
| Height velocity SDS                    | -1.01 (-1.07 to -0.95)                | -1.51 (-1.69 to -1.33)       | -0.98 (-1.06 to -0.89)        | -1.04 (-1.22 to -0.87)     | -0.63 (-0.80 to -0.47)                           |
| GH dose (mg/kg/week)                   | 0.27 (0.26 to 0.27)                   | 0.22 (0.21 to 0.22)          | 0.25 (0.24 to 0.25)           | 0.32 (0.31 to 0.32)        | 0.33 (0.32 to 0.34)                              |
| Stimulated peak GH (µg/l)              | 9.46 (9.18 to 9.74)                   | 4.18 (3.80 to 4.55)          | 8.26 (7.95 to 8.57)           | 14.06 (12.50 to 15.61)     | 16.49 (15.51 to 17.47)                           |
| NAH                                    |                                       |                              |                               |                            |                                                  |
| Age                                    | 17.3 (17.2 to 17.3)                   | 18.0 (17.8 to 18.2)          | 17.2 (17.1 to 17.3)           | 17.1 (16.9 to 17.3)        | 17.2 (17.0 to 17.4)                              |
| Height SDS                             | -1.18 (-1.21 to -1.15)                | -0.80 (-0.90 to -0.69)       | -1.01 (-1.05 to -0.97)        | -1.70 (-1.77 to -1.63)     | -1.26 (-1.34 to -1.18)                           |
| NAH SDS – baseline height              | 1.24 (1.21 to 1.27)                   | 1.46 (1.35 to 1.58)          | 1.37 (1.33 to 1.41)           | 0.95 (0.89 to 1.01)        | 1.10 (1.02 to 1.19)                              |
| SDS                                    |                                       |                              |                               |                            |                                                  |
| Target height SDS deficit <sup>f</sup> | -0.76 (-0.79 to -0.77)                | -0.73 (-0.83 to -0.62)       | -0.43 (-0.47 to -0.39)        | -1.74 (-1.81 to -1.66)     | -0.60 (-0.70 to -0.51)                           |
| GH therapy duration (years)            | 5.82 (5.72 to 5.91)                   | 7.59 (7.26 to 7.91)          | 5.51 (5.37 to 5.64)           | 6.38 (6.12 to 6.63)        | 4.67 (4.44 to 4.91)                              |
| Last GH dose (mg/kg/week)              | 0.28 (0.28 to 0.28)                   | 0.20 (0.19 to 0.21)          | 0.27 (0.26 to 0.27)           | 0.32 (0.31 to 0.33)        | 0.36 (0.35 to 0.37)                              |
| Near-adult height SDS > -2 (%)         | 81%                                   | 84%                          | 86%                           | 66%                        | 82%                                              |

Note: GH = growth hormone, IGHD = idiopathic growth hormone deficiency, NA = data available for <60% of patients, NAH = near-adult height, OGHD = organic growth hormone deficiency, SDS = standard deviation score.

Data show mean (95% confidence intervals), except final height SDS > -2, which shows percentage of patients.

<sup>a</sup>50.2% male.



<sup>b</sup>67.9% male.

<sup>c</sup>66.0% male.

<sup>d</sup>90.0% male.

<sup>e</sup>Baseline height SDS minus target height SDS.

<sup>f</sup>Near-adult height SDS minus target height SDS.

<sup>g</sup>50.7% male.

<sup>h</sup>59.4% male.

<sup>i</sup>60.8% male.

<sup>j</sup>65.2% male.

Confidential

1  
2  
3  
4  
5  
6  
7  
8  
9  
10  
11  
12  
13  
14  
15  
16  
17  
18  
19  
20  
21  
22  
23  
24  
25  
26  
27  
28  
29  
30  
31  
32  
33  
34  
35  
36  
37  
38  
39  
40  
41  
42  
43  
44  
45  
46  
47

**Table 4:** Serious and treatment-emergent adverse events reported in Canada<sup>a</sup>

|                                                           | Patients reporting adverse events, n (% of N) |            |           |                 |                          |                           |
|-----------------------------------------------------------|-----------------------------------------------|------------|-----------|-----------------|--------------------------|---------------------------|
|                                                           | All patients                                  | OGHD       | IGHD      | Turner syndrome | Idiopathic short stature | Small for gestational age |
| All GH-treated patients                                   | N=850                                         | N=379      | N=147     | N=156           | N=38                     | N=19                      |
| Deaths <sup>b</sup>                                       | 11 (1.3)                                      | 7 (1.8)    | 0         | 1 (0.6)         | 0                        | 0                         |
| Cause of death considered GH-related <sup>c</sup>         | 2 (0.2)                                       | 2 (0.5)    | 0         | 0               | 0                        | 0                         |
| Serious adverse events                                    | 97 (11.4)                                     | 61 (16.1)  | 7 (4.8)   | 9 (5.8)         | 3 (7.9)                  | 1 (5.3)                   |
| Serious adverse events considered GH-related <sup>d</sup> | 19 (2.2)                                      | 12 (3.2)   | 1 (0.7)   | 4 (2.6)         | 2 (5.3)                  | 0                         |
| GH-treated patients with ≥1 follow-up visit               | N=833                                         | N=377      | N=137     | N=153           | N=38                     | N=19                      |
| Patients with ≥1 TEAE <sup>e</sup>                        | 587 (70.5)                                    | 299 (79.3) | 72 (52.6) | 108 (70.6)      | 21 (55.3)                | 13 (68.4)                 |
| Headache                                                  | 88 (10.6)                                     | 55 (14.6)  | 12 (8.8)  | 9 (5.9)         | 2 (5.3)                  | 3 (15.8)                  |
| Secondary hypothyroidism                                  | 60 (7.2)                                      | 45 (11.9)  | 6 (4.4)   | 1 (0.7)         | 0                        | 0                         |
| Scoliosis                                                 | 54 (6.5)                                      | 22 (5.8)   | 10 (7.3)  | 12 (7.8)        | 0                        | 3 (15.8)                  |
| Ovarian failure                                           | 50 (6.0)                                      | 9 (2.4)    | 0         | 41 (26.8)       | 0                        | 0                         |
| Arthralgia                                                | 48 (5.8)                                      | 16 (4.2)   | 5 (3.7)   | 13 (8.5)        | 1 (2.6)                  | 1 (5.3)                   |
| Upper respiratory tract infection                         | 44 (5.3)                                      | 31 (8.2)   | 5 (3.7)   | 6 (3.9)         | 0                        | 1 (5.3)                   |
| Hypothyroidism                                            | 42 (5.0)                                      | 29 (7.7)   | 4 (2.9)   | 8 (5.2)         | 0                        | 0                         |
| TEAEs considered GH-related <sup>f</sup>                  | 87 (10.4)                                     | 48 (12.7)  | 6 (4.4)   | 18 (11.8)       | 3 (7.9)                  | 2 (10.5)                  |
| Headache                                                  | 19 (2.3)                                      | 16 (4.2)   | 0         | 2 (1.3)         | 0                        | 1 (5.3)                   |
| Scoliosis                                                 | 10 (1.2)                                      | 9 (2.4)    | 1 (0.7)   | 0               | 0                        | 0                         |
| Arthralgia                                                | 9 (1.1)                                       | 4 (1.1)    | 0         | 3 (2.0)         | 0                        | 0                         |
| Insulin-like growth factor increased                      | 9 (1.1)                                       | 0          | 0         | 5 (3.3)         | 0                        | 1 (5.3)                   |
| Melanocytic nevus                                         | 7 (0.8)                                       | 4 (1.1)    | 0         | 3 (2.0)         | 0                        | 0                         |
| Otitis media                                              | 6 (0.7)                                       | 4 (1.1)    | 0         | 2 (1.3)         | 0                        | 0                         |

Note: GH = growth hormone, IGHD = idiopathic growth hormone deficiency, OGHD = organic growth hormone deficiency, TEAE = treatment-emergent adverse event.  
<sup>a</sup>Serious adverse events and TEAEs reported in all patients in Canada, and by diagnostic groups, for patients who received GH treatment, and TEAEs for GH-treated patients who had at least one post-baseline visit.

<sup>b</sup>See Supplementary Table 2 for details of deaths.

<sup>c</sup>Both deaths were due to recurrence of medulloblastoma.

<sup>d</sup>All GH-related serious adverse events occurred in single patients except for medulloblastoma recurrence for two patients (both with OGHD) and adenoidal hypertrophy for two patients (one with OGHD, one with Turner syndrome). Other serious adverse events reported as GH-related were meningioma, neoplasm progression, aortic valve incompetence, rectal hemorrhage, edema, death, parotitis, upper limb fracture, type 1 diabetes mellitus, optic glioma, anaplastic astrocytoma, adrenal neoplasm, increased intracranial pressure, ischemic stroke, tonsillar hypertrophy, sleep apnea syndrome, scoliosis surgery, meningioma surgery, adenoidectomy, angiodysplasia (patients could experience >1 event).

<sup>e</sup>Any TEAE irrespective of relatedness, with frequency >5% for all patients.

<sup>f</sup>Any TEAE considered related, with frequency >0.5% for all patients.

Confidential

1  
2  
3  
4  
5  
6  
7  
8  
9  
10  
11  
12  
13  
14  
15  
16  
17  
18  
19  
20  
21  
22  
23  
24  
25  
26  
27  
28  
29  
30  
31  
32  
33  
34  
35  
36  
37  
38  
39  
40  
41  
42  
43  
44  
45  
46  
47

**Supplemental Table 1:** Patient characteristics and auxological data at baseline for growth hormone-treated children, by primary diagnostic category (all patients with known diagnosis and baseline height standard deviation score available)

a) Canada

|                                        | OGHD                   | IGHD                   | Turner syndrome        | Idiopathic short stature | Small for gestational age |
|----------------------------------------|------------------------|------------------------|------------------------|--------------------------|---------------------------|
| Number of patients                     | n=310                  | n=125                  | n=148                  | n=33                     | n=17                      |
| Males (%)                              | 68.1%                  | 69.6%                  | –                      | 84.8%                    | 41.2%                     |
| Age (years)                            | 7.2 (6.7 to 7.7)       | 10.0 (9.1 to 10.8)     | 9.3 (8.7 to 9.8)       | 12.2 (11.1 to 13.2)      | 6.6 (4.6 to 8.5)          |
| Height SDS                             | –2.27 (–2.44 to –2.10) | –2.67 (–2.88 to –2.46) | –2.93 (–3.05 to –2.80) | –2.67 (–2.98 to –2.37)   | –3.81 (–4.44 to –3.18)    |
| Height velocity (cm/year)              | 5.18 (4.61 to 5.75)    | 4.80 (4.27 to 5.33)    | 4.61 (4.19 to 5.03)    | 4.91 (4.26 to 5.56)      | 7.77 (5.74 to 9.81)       |
| Height velocity SDS                    | –1.79 (–2.03 to –1.54) | –1.29 (–1.58 to –1.01) | –1.20 (–1.56 to –0.83) | –0.35 (–1.16 to 0.46)    | 0.03 (–1.15 to 1.20)      |
| Target height SDS                      | 0.04 (–0.07 to 0.14)   | –0.41 (–0.58 to –0.24) | –0.03 (–0.17 to 0.10)  | –0.57 (–0.84 to –0.30)   | –0.28 (–0.55 to 0.00)     |
| Target height SDS deficit <sup>a</sup> | –2.45 (–2.65 to –2.26) | –2.27 (–2.53 to –2.00) | –2.92 (–3.07 to –2.77) | –2.08 (–2.43 to –1.74)   | –3.44 (–4.10 to –2.79)    |
| Stimulated peak GH (µg/l)              | 3.3 (2.7 to 4.0)       | 4.6 (3.9 to 5.3)       | NA                     | 24.1 (17.8 to 30.5)      | NA                        |
| GH dose (mg/kg/week)                   | 0.18 (0.18 to 0.19)    | 0.19 (0.18 to 0.20)    | 0.29 (0.28 to 0.29)    | 0.23 (0.21 to 0.25)      | 0.23 (0.20 to 0.26)       |

b) All countries combined (including Canada)

|                                        | OGHD                   | IGHD                   | Turner syndrome        | Idiopathic short stature | Small for gestational age |
|----------------------------------------|------------------------|------------------------|------------------------|--------------------------|---------------------------|
| Number of patients                     | n=2508                 | n=10189                | n=1712                 | n=2657                   | n=1209                    |
| Males (%)                              | 65.5%                  | 67.6%                  | –                      | 71.9%                    | 54.7%                     |
| Age (years)                            | 8.2 (8.0 to 8.3)       | 10.1 (10.0 to 10.2)    | 8.8 (8.6 to 9.0)       | 11.3 (11.1 to 11.4)      | 8.2 (8.0 to 8.4)          |
| Height SDS                             | –2.42 (–2.48 to –2.36) | –2.41 (–2.43 to –2.40) | –2.60 (–2.65 to –2.56) | –2.41 (–2.44 to –2.38)   | –2.68 (–2.73 to –2.63)    |
| Height velocity (cm/year)              | 4.72 (4.55 to 4.90)    | 4.71 (4.66 to 4.77)    | 4.99 (4.82 to 5.16)    | 4.82 (4.71 to 4.93)      | 5.42 (5.24 to 5.60)       |
| Height velocity SDS                    | –1.61 (–1.72 to –1.51) | –1.03 (–1.07 to –0.98) | –1.14 (–1.26 to –1.02) | –0.77 (–0.86 to –0.69)   | –0.84 (–0.97 to –0.72)    |
| Target height SDS                      | –0.06 (–0.10 to –0.02) | –0.55 (–0.57 to –0.53) | 0.02 (–0.03 to 0.06)   | –0.55 (–0.58 to –0.52)   | –0.62 (–0.67 to –0.57)    |
| Target height SDS deficit <sup>a</sup> | –2.43 (–2.49 to –2.36) | –1.86 (–1.88 to –1.84) | –2.61 (–2.67 to –2.56) | –1.86 (–1.90 to –1.82)   | –2.06 (–2.13 to –1.99)    |

|                                        |                     |                     |                     |                     |                     |
|----------------------------------------|---------------------|---------------------|---------------------|---------------------|---------------------|
| Stimulated peak GH ( $\mu\text{g/l}$ ) | 4.2 (4.0 to 4.4)    | 8.2 (8.0 to 8.3)    | NA                  | 16.8 (16.4 to 17.2) | NA                  |
| GH dose (mg/kg/week)                   | 0.23 (0.22 to 0.23) | 0.25 (0.25 to 0.25) | 0.32 (0.31 to 0.32) | 0.33 (0.33 to 0.34) | 0.28 (0.28 to 0.29) |

Note: GH = growth hormone, IGHD = idiopathic growth hormone deficiency, NA = data available for <60% of patients, OGHD = organic growth hormone deficiency, SDS = standard deviation score.

Data show mean (95% confidence intervals); patient numbers are for those with height SDS at baseline and 1 year, but not all patients had all other information.

<sup>a</sup>Height SDS minus target height SDS.

Confidential

**Supplemental Table 2:** Cause of death and characteristics of growth hormone-treated patients who died during study, grouped by primary diagnosis of growth disorder

| Diagnostic group                                | Sex    | Age     | Time from | GH       | Cause of death              | Probably    |
|-------------------------------------------------|--------|---------|-----------|----------|-----------------------------|-------------|
| Primary diagnosis                               |        | (years) | GH start  | duration |                             | or possibly |
|                                                 |        |         | (years)   | (years)  |                             | related     |
| OGHD                                            |        |         |           |          |                             |             |
| Acute lymphoblastic leukemia                    | Male   | 12      | 4.8       | 4.3      | Cerebral neuroblastoma      | No          |
| Astrocytoma                                     | Male   | 9       | 3.3       | 0.3      | Astrocytoma recurrence      | No          |
| Astrocytoma                                     | Male   | 15      | 6.4       | 6.2      | Astrocytoma recurrence      | No          |
| Medulloblastoma                                 | Male   | 11      | 3.7       | 3.3      | Medulloblastoma recurrence  | Yes         |
| Medulloblastoma                                 | Male   | 12      | 1.4       | 1.5      | Medulloblastoma recurrence  | Yes         |
| Hypopituitarism                                 | Male   | 0.6     | 0.2       | 0.2      | Cardiorespiratory arrest    | No          |
| Septo-optic dysplasia and hypopituitarism       | Male   | 1.9     | 1.5       | 1.5      | Gastrointestinal hemorrhage | No          |
| Turner syndrome                                 |        |         |           |          |                             |             |
| Turner syndrome                                 | Female | 16      | 9.8       | 5.5      | Metastatic Ewing sarcoma    | No          |
| Other                                           |        |         |           |          |                             |             |
| Chronic renal insufficiency and Down syndrome   | Male   | 3       | 1.7       | 1.7      | Cardiorespiratory arrest    | No          |
| Duchenne muscular dystrophy                     | Male   | 15      | 0.2       | 0.2      | Cardiac arrest              | No          |
| Pseudohypoparathyroidism and panhypopituitarism | Male   | 11      | 10.7      | 10.7     | Pneumonia                   | No          |

Note: GH = growth hormone, OGHD = organic growth hormone deficiency.
